# Supplementary material
Source: MDPI journal article supplement (https://www.mdpi.com/2624-5647/6/1/6)
Supplement: s1 [file s1]

**Supplementary file S1. Full search strategy.**

| Database [Platform] Searches run May 17, 2022                                                                      | Results     |
|--------------------------------------------------------------------------------------------------------------------|-------------|
| MEDLINE(R) and Epub Ahead of Print, In-Process & Other Non-Indexed Citations and Daily [OVID] 1946 to May 16, 2022 | 74          |
| Embase Classic+Embase [OVID] 1947 to May 16, 2022                                                                  | 430         |
| Scopus - May 17, 2022                                                                                              | 621         |
| <b>TOTAL</b>                                                                                                       | <b>1125</b> |
| <b>Deduplicated total (263 duplicates removed in EndNote)</b>                                                      | <b>862</b>  |

22341242.ui - Berger et al

Search Strategies:

Set 1 AND Set 2 AND Set 3

**Medline**

Set 1 Abdominal Radiography

Exp "radiography, abdominal"/ or "Diagnostic Imaging"/ or "Colonography, Computed Tomographic"/  
Or

((abdomen\* or abdominal\*) adj4 (radiograph\* or diagnostic imag\* or xray\* or x-ray\* or x-radiograph\*  
or imag\* or diagnostic X-Ray\*)).tw,kw,kf,fs,sh

or

(cholangiograph\* or endoscopic retrograde cholangiopancreatograph\* or cholecystograph\* or  
Videodefecography or defecograph\* or portograph\* or colonic transit study or colonic transit  
studies).tw,kw,kf,fs,sh

or

("Virtual Colonoscop\*" or "Computed Tomographic Colonograph\*" or "CT Colonograph\*" or "X-Ray  
Computed Tomograph\*" or "XRay Computed Tomograph\*" or "CT X-Ray\$" or "CT xray\$" or  
Tomodensitometr\$ or "X-Ray CAT Scan\$" or "xray CAT Scan\$").tw,kw,kf,fs,sh

Set 2 Constipation and its synonyms

Exp "Constipation"/ or "Colonic Diseases, Functional"/ or (constipat\* or Dyschezi\* or Colonic Inertia or  
f\$ecal\* impact\* or f\$ecal retention or bowel dysfunction\$ or slow colonic transit\* or "non-retentive  
f\$ecal incontinence" or "NFRI" or "functional colonic disease\$").tw,kw,kf,fs,sh

Set 3 Sensitivity

Exp "Sensitivity and specificity"/ or exp "Predictive Value of Tests"/ or exp "Reference Values"/ or exp  
"ROC Curve"/

or

(sensitiv\* or specific\* or screening or false positive or false negative or accura\* or predict\* or "reference  
value\$" or "reference range\$" or "roc" or "roc analys\$s" or "roc area\$" or "roc auc" or "roc  
characteristic\$" or "roc curve\$" or "roc curve method\$" or "roc estimate\$" or "roc evaluation\$" or  
"Receiver Operating Characteristic" or "likelihood ratio").tw,kw,kf,fs,sh

## **Embase**

### Set 1 Abdominal Radiography

Exp "abdominal radiography"/ or "Diagnostic Imaging"/ or "computed tomographic colonography"/

Or

((abdomen\* or abdominal\*) adj4 (radiograph\* or diagnostic imag\* or xray\* or x-ray\* or x-radiograph\* or imag\* or diagnostic X-Ray\*)).tw,kw,kf,fs,sh

or

(cholangiograph\* or endoscopic retrograde cholangiopancreatograph\* or cholecystograph\* or Videodefecography or defecograph\* or portograph\* or colonic transit study or colonic transit studies).tw,kw,kf,fs,sh

or

("Virtual Colonoscop\*" or "Computed Tomographic Colonograph\*" or "CT Colonograph\*" or "X-Ray Computed Tomograph\*" or "XRay Computed Tomograph\*" or "CT X-Ray\$" or "CT xray\$" or Tomodensitometr\$ or "X-Ray CAT Scan\$" or "xray CAT Scan\$").tw,kw,kf,fs,sh

### Set 2 Constipation and its synonyms

Exp "Constipation"/ or "irritable colonic"/ or (constipat\* or Dyschezi\* or Colonic Inertia or f\$ecal\* impact\* or f\$ecal retention or bowel dysfunction\$ or slow colonic transit\* or "non-retentive f\$ecal incontinence" or "NFRI" or "functional colonic disease\$").tw,kw,kf,fs,sh

### Set 3 Sensitivity

Exp "Sensitivity and specificity"/ or exp "Predictive Value"/ or exp "Reference Values"/ or exp "receiver operating characteristic"/

or

(sensitiv\* or specific\* or screening or false positive or false negative or accura\* or predict\* or "reference value\$" or "reference range\$" or "roc" or "roc analys\$s" or "roc area\$" or "roc auc" or "roc characteristic\$" or "roc curve\$" or "roc curve method\$" or "roc estimate\$" or "roc evaluation\$" or "Receiver Operating Characteristic" or "likelihood ratio").tw,kw,kf,fs,sh

## **scopus**

### Set 1 Abdominal Radiography

ALL ("abdominal radiograph\*" OR "diagnostic imaging" OR "computed tomographic colonography\*")

Or

TITLE-ABS-KEY ( ( ( abdom\* W/4 radiograph\* OR "diagnostic imag\*" OR "xray\*" OR "x-ray\*" OR "x-radiograph\*" OR "imag\*" OR "diagnostic X-Ray\*" ) ) )

or

TITLE-ABS-KEY ( ( cholangiograph\* OR "endoscopic retrograde cholangiopancreatograph\*" OR cholecystograph\* OR videodefecography OR defecograph\* OR portograph\* OR "colonic transit study" OR "colonic transit studies" ) )

or

TITLE-ABS-KEY (("Virtual Colonoscop\*" or "Computed Tomographic Colonograph\*" or "CT Colonograph\*" or "X-Ray Computed Tomograph\*" or "XRay Computed Tomograph\*" or "CT X-Ray\$" or "CT xray\$" or Tomodensitometr\$ or "X-Ray CAT Scan\$" or "xray CAT Scan\$"))

### Set 2 Constipation and its synonyms

ALL ("Constipation" or "Functional Colonic Disease\*")

or

TITLE-ABS-KEY ((constipat\* or Dyschezi\* or "Colonic Inertia" or "f\$ecal\* impact\*" or "f\$ecal retention" or "bowel dysfunction\$" or "slow colonic transit\*" or "non-retentive f\$ecal incontinence" or "NFRI" or "functional colonic disease\$"))

### Set 3 Sensitivity

ALL ("Predictive Value of Tests" or "Reference Values" or "ROC Curve")

or

TITLE-ABS-KEY ((sensitiv\* or specific\* or screening or "false positive" or "false negative" or accura\* or predict\* or "reference value\$" or "reference range\$" or "roc" or "roc analys\$s" or "roc area\$" or "roc auc" or "roc characteristic\$" or "roc curve\$" or "roc curve method\$" or "roc estimate\$" or "roc evaluation\$" or "Receiver Operating Characteristic" or "likelihood ratio"))

Ovid MEDLINE(R) and Epub Ahead of Print, In-Process, In-Data-Review & Other Non-Indexed Citations and Daily <1946 to May 16, 2022>

| #  | Searches                                                                                                                                                                                                                                                                                                                                                                                          | Results |
|----|---------------------------------------------------------------------------------------------------------------------------------------------------------------------------------------------------------------------------------------------------------------------------------------------------------------------------------------------------------------------------------------------------|---------|
| 1  | exp "radiography, abdominal"/ or "Diagnostic Imaging"/ or "Colonography, Computed Tomographic"/                                                                                                                                                                                                                                                                                                   | 89837   |
| 2  | ((abdomen* or abdominal*) adj4 (radiograph* or diagnostic imag* or xray* or x-ray* or x-radiograph* or imag* or diagnostic X-Ray*)).tw,kw,kf,fs,sh.                                                                                                                                                                                                                                               | 22641   |
| 3  | (cholangiograph* or endoscopic retrograde cholangiopancreatograph* or cholecystograph* or Videodefecography or defecograph* or portograph* or colonic transit study or colonic transit studies).tw,kw,kf,fs,sh.                                                                                                                                                                                   | 33518   |
| 4  | ("Virtual Colonoscop*" or "Computed Tomographic Colonograph*" or "CT Colonograph*" or "X-Ray Computed Tomograph*" or "XRay Computed Tomograph*" or "CT X-Ray\$" or "CT xray\$" or Tomodensitometr\$ or "X-Ray CAT Scan\$" or "xray CAT Scan\$").tw,kw,kf,fs,sh.                                                                                                                                   | 8353    |
| 5  | or/1-4                                                                                                                                                                                                                                                                                                                                                                                            | 122910  |
| 6  | exp "Constipation"/ or "Colonic Diseases, Functional"/ or (constipat* or Dyschezi* or Colonic Inertia or f\$ecal* impact* or f\$ecal retention or bowel dysfunction\$ or slow colonic transit* or "non-retentive f\$ecal incontinence" or "NFRI" or "functional colonic disease\$").tw,kw,kf,fs,sh.                                                                                               | 37568   |
| 7  | 5 and 6                                                                                                                                                                                                                                                                                                                                                                                           | 1390    |
| 8  | exp "Sensitivity and specificity"/ or exp "Predictive Value of Tests"/ or exp "Reference Values"/ or exp "ROC Curve"/                                                                                                                                                                                                                                                                             | 782696  |
| 9  | (sensitiv* or specific* or screening or false positive or false negative or accura* or predict* or "reference value\$" or "reference range\$" or "roc" or "roc analys\$s" or "roc area\$" or "roc auc" or "roc characteristic\$" or "roc curve\$" or "roc curve method\$" or "roc estimate\$" or "roc evaluation\$" or "Receiver Operating Characteristic" or "likelihood ratio").tw,kw,kf,fs,sh. | 3684118 |
| 10 | 8 or 9                                                                                                                                                                                                                                                                                                                                                                                            | 3866640 |
| 11 | 7 and 10                                                                                                                                                                                                                                                                                                                                                                                          | 247     |

|    |                                           |     |
|----|-------------------------------------------|-----|
| 12 | limit 11 to (english language and humans) | 193 |
| 13 | limit 12 to yr="2012 -Current"            | 74  |
| 14 | "22341242".ui.                            | 1   |
| 15 | 13 and 14                                 | 1   |
| 16 | remove duplicates from 13                 | 74  |

Embase Classic+Embase <1947 to 2022 Week 19>

| #  | Searches                                                                                                                                                                                                                                                                                                                                                                                          | Results |
|----|---------------------------------------------------------------------------------------------------------------------------------------------------------------------------------------------------------------------------------------------------------------------------------------------------------------------------------------------------------------------------------------------------|---------|
| 1  | exp "abdominal radiography"/ or "Diagnostic Imaging"/ or "computed tomographic colonography"/                                                                                                                                                                                                                                                                                                     | 268183  |
| 2  | ((abdomen* or abdominal*) adj4 (radiograph* or diagnostic imag* or xray* or x-ray* or x-radiograph* or imag* or diagnostic X-Ray*)).tw,kw,kf,fs,sh.                                                                                                                                                                                                                                               | 68704   |
| 3  | (cholangiograph* or endoscopic retrograde cholangiopancreatograph* or cholecystograph* or Videodefecography or defecograph* or portograph* or colonic transit study or colonic transit studies).tw,kw,kf,fs,sh.                                                                                                                                                                                   | 71366   |
| 4  | ("Virtual Colonoscop*" or "Computed Tomographic Colonograph*" or "CT Colonograph*" or "X-Ray Computed Tomograph*" or "XRay Computed Tomograph*" or "CT X-Ray\$" or "CT xray\$" or Tomodensitometr\$ or "X-Ray CAT Scan\$" or "xray CAT Scan\$").tw,kw,kf,fs,sh.                                                                                                                                   | 91461   |
| 5  | or/1-4                                                                                                                                                                                                                                                                                                                                                                                            | 444522  |
| 6  | exp "Constipation"/ or "irritable colonic"/ or (constipat* or Dyschezi* or Colonic Inertia or f\$ecal* impact* or f\$ecal retention or bowel dysfunction\$ or slow colonic transit* or "non-retentive f\$ecal incontinence" or "NFRI" or "functional colonic disease\$").tw,kw,kf,fs,sh.                                                                                                          | 116634  |
| 7  | exp "Sensitivity and specificity"/ or exp "Predictive Value"/ or exp "Reference Values"/ or exp "receiver operating characteristic"/                                                                                                                                                                                                                                                              | 789441  |
| 8  | (sensitiv* or specific* or screening or false positive or false negative or accura* or predict* or "reference value\$" or "reference range\$" or "roc" or "roc analys\$s" or "roc area\$" or "roc auc" or "roc characteristic\$" or "roc curve\$" or "roc curve method\$" or "roc estimate\$" or "roc evaluation\$" or "Receiver Operating Characteristic" or "likelihood ratio").tw,kw,kf,fs,sh. | 9269695 |
| 9  | 7 or 8                                                                                                                                                                                                                                                                                                                                                                                            | 9325191 |
| 10 | 5 and 6 and 9                                                                                                                                                                                                                                                                                                                                                                                     | 1178    |
| 11 | limit 10 to (human and english language and yr="2012 -Current")                                                                                                                                                                                                                                                                                                                                   | 796     |
| 12 | (conference abstract or "Case Reports" or editorial or comment or letter or newspaper article).pt.                                                                                                                                                                                                                                                                                                | 6340751 |
| 13 | 11 not 12                                                                                                                                                                                                                                                                                                                                                                                         | 432     |
| 14 | remove duplicates from 13                                                                                                                                                                                                                                                                                                                                                                         | 430     |

**Scopus**

14 ( ( ( ALL ( all "abdominal radiograph\*" OR "Diagnostic Imaging" OR "computed tomographic colonography\*" ) ) OR ( TITLE-ABS-KEY ( ( abdom\* W/4 radiograph\* OR "diagnostic imag\*" OR "xray\*" OR "x-ray\*" OR "x-radiograph\*" OR "imag\*" OR "diagnostic X-Ray\*" ) ) ) ) OR ( TITLE-ABS-KEY ( ( cholangiograph\* OR "endoscopic retrograde cholangiopancreatograph\*" OR cholecystograph\* OR videodefecography OR defecograph\* OR portograph\* OR "colonic transit study" OR "colonic transit studies" ) ) ) OR ( TITLE-ABS-KEY ( ( "Virtual Colonoscop\*" OR "Computed Tomographic Colonograph\*" OR "CT Colonograph\*" OR "X-Ray Computed Tomograph\*" OR "XRay Computed Tomograph\*" OR "CT X-Ray\$" OR "CT xray\$" OR tomodensitometr\$ OR "X-Ray CAT Scan\$" OR "xray CAT Scan\$" ) ) ) ) AND ( ( ALL ( "Constipation" OR "Functional Colonic Disease\*" ) ) OR ( TITLE-ABS-KEY ( ( constipat\* OR dyschezi\* OR "Colonic Inertia" OR "f\$ecal\* impact\*" OR "f\$ecal retention" OR "bowel dysfunction\$" OR "slow colonic transit\*" OR "non-retentive f\$ecal incontinence" OR "NFRI" OR "functional colonic disease\$" ) ) ) ) ) AND ( ( ALL ( "Predictive Value of Tests" OR "Reference Values" OR "ROC Curve" ) ) OR ( TITLE-ABS-KEY ( ( sensitiv\* OR specific\* OR screening OR "false positive" OR "false negative" OR accura\* OR predict\* OR "reference value\$" OR "reference range\$" OR "roc" OR "roc analys\$s" OR "roc area\$" OR "roc auc" OR "roc characteristic\$" OR "roc curve\$" OR "roc curve method\$" OR "roc estimate\$" OR "roc evaluation\$" OR "Receiver Operating Characteristic" OR "likelihood ratio" ) ) ) ) AND ( LIMIT-TO ( DOCTYPE , "ar" ) ) AND ( LIMIT-TO ( EXACTKEYWORD , "Humans" ) ) AND ( LIMIT-TO ( LANGUAGE , "English" ) ) AND ( LIMIT-TO ( SRCTYPE , "j" ) ) ... 621 document results

13 ( ( ( ALL ( all "abdominal radiograph\*" OR "Diagnostic Imaging" OR "computed tomographic colonography\*" ) ) OR ( TITLE-ABS-KEY ( ( abdom\* W/4 radiograph\* OR "diagnostic imag\*" OR "xray\*" OR "x-ray\*" OR "x-radiograph\*" OR "imag\*" OR "diagnostic X-Ray\*" ) ) ) ) OR ( TITLE-ABS-KEY ( ( cholangiograph\* OR "endoscopic retrograde cholangiopancreatograph\*" OR cholecystograph\* OR videodefecography OR defecograph\* OR portograph\* OR "colonic transit study" OR "colonic transit studies" ) ) ) OR ( TITLE-ABS-KEY ( ( "Virtual Colonoscop\*" OR "Computed Tomographic Colonograph\*" OR "CT Colonograph\*" OR "X-Ray Computed Tomograph\*" OR "XRay Computed Tomograph\*" OR "CT X-Ray\$" OR "CT xray\$" OR tomodensitometr\$ OR "X-Ray CAT Scan\$" OR "xray CAT Scan\$" ) ) ) ) AND ( ( ALL ( "Constipation" OR "Functional Colonic Disease\*" ) ) OR ( TITLE-ABS-KEY ( ( constipat\* OR dyschezi\* OR "Colonic Inertia" OR "f\$ecal\* impact\*" OR "f\$ecal retention" OR "bowel dysfunction\$" OR "slow colonic transit\*" OR "non-retentive f\$ecal incontinence" OR "NFRI" OR "functional colonic disease\$" ) ) ) ) ) AND ( ( ALL ( "Predictive Value of Tests" OR "Reference Values" OR "ROC Curve" ) ) OR ( TITLE-ABS-KEY ( ( sensitiv\* OR specific\* OR screening OR "false positive" OR "false negative" OR accura\* OR predict\* OR "reference value\$" OR "reference range\$" OR "roc" OR "roc analys\$s" OR "roc area\$" OR "roc auc" OR "roc characteristic\$" OR "roc curve\$" OR "roc curve method\$" OR "roc estimate\$" OR "roc evaluation\$" OR "Receiver Operating Characteristic" OR "likelihood ratio" ) ) ) ) AND ( LIMIT-TO ( PUBYEAR , 2022 ) OR LIMIT-TO ( PUBYEAR , 2021 ) OR LIMIT-TO ( PUBYEAR , 2020 ) OR LIMIT-TO ( PUBYEAR , 2019 ) OR LIMIT-TO ( PUBYEAR , 2018 ) OR LIMIT-TO ( PUBYEAR , 2017 ) OR LIMIT-TO ( PUBYEAR , 2016 ) OR LIMIT-TO ( PUBYEAR , 2015 ) OR LIMIT-TO ( PUBYEAR , 2014 ) OR LIMIT-TO ( PUBYEAR , 2013 ) OR LIMIT-TO ( PUBYEAR , 2012 ) ) ... 1,091 document results

12 ( ( ( ALL ( all "abdominal radiograph\*" OR "Diagnostic Imaging" OR "computed tomographic colonography\*" ) ) OR ( TITLE-ABS-KEY ( ( abdom\* W/4 radiograph\* OR "diagnostic imag\*" OR "xray\*" OR "x-ray\*" OR "x-radiograph\*" OR "imag\*" OR "diagnostic X-Ray\*" ) ) ) ) OR ( TITLE-ABS-

KEY ( ( cholangiograph\* OR "endoscopic retrograde cholangiopancreatograph\*" OR cholecystograph\* OR videodefecography OR defecograph\* OR portograph\* OR "colonic transit study" OR "colonic transit studies" ) ) ) OR ( TITLE-ABS-KEY ( ( "Virtual Colonoscop\*" OR "Computed Tomographic Colonograph\*" OR "CT Colonograph\*" OR "X-Ray Computed Tomograph\*" OR "XRay Computed Tomograph\*" OR "CT X-Ray\$" OR "CT xray\$" OR tomodensitometr\$ OR "X-Ray CAT Scan\$" OR "xray CAT Scan\$" ) ) ) AND ( ( ALL ( "Constipation" OR "Functional Colonic Disease\*" ) ) OR ( TITLE-ABS-KEY ( ( constipat\* OR dyschezi\* OR "Colonic Inertia" OR "f\$ecal\* impact\*" OR "f\$ecal retention" OR "bowel dysfunction\$" OR "slow colonic transit\*" OR "non-retentive f\$ecal incontinence" OR "NFRI" OR "functional colonic disease\$" ) ) ) ) AND ( ( ALL ( "Predictive Value of Tests" OR "Reference Values" OR "ROC Curve" ) ) OR ( TITLE-ABS-KEY ( ( sensitiv\* OR specific\* OR screening OR "false positive" OR "false negative" OR accura\* OR predict\* OR "reference value\$" OR "reference range\$" OR "roc" OR "roc analys\$s" OR "roc area\$" OR "roc auc" OR "roc characteristic\$" OR "roc curve\$" OR "roc curve method\$" OR "roc estimate\$" OR "roc evaluation\$" OR "Receiver Operating Characteristic" OR "likelihood ratio" ) ) ) ) ... 1,664 document results

11 ( ALL ( "Predictive Value of Tests" OR "Reference Values" OR "ROC Curve" ) ) OR ( TITLE-ABS-KEY ( ( sensitiv\* OR specific\* OR screening OR "false positive" OR "false negative" OR accura\* OR predict\* OR "reference value\$" OR "reference range\$" OR "roc" OR "roc analys\$s" OR "roc area\$" OR "roc auc" OR "roc characteristic\$" OR "roc curve\$" OR "roc curve method\$" OR "roc estimate\$" OR "roc evaluation\$" OR "Receiver Operating Characteristic" OR "likelihood ratio" ) ) ) 17,442,026 document results

11 TITLE-ABS-KEY ( ( sensitiv\* OR specific\* OR screening OR "false positive" OR "false negative" OR accura\* OR predict\* OR "reference value\$" OR "reference range\$" OR "roc" OR "roc analys\$s" OR "roc area\$" OR "roc auc" OR "roc characteristic\$" OR "roc curve\$" OR "roc curve method\$" OR "roc estimate\$" OR "roc evaluation\$" OR "Receiver Operating Characteristic" OR "likelihood ratio" ) ) 17,367,818 document results

10 ALL ( "Predictive Value of Tests" OR "Reference Values" OR "ROC Curve" ) 611,312 document results

9 ( ( ALL ( all "abdominal radiograph\*" OR "Diagnostic Imaging" OR "computed tomographic colonography\*" ) ) ) OR ( TITLE-ABS-KEY ( ( abdom\* W/4 radiograph\* OR "diagnostic imag\*" OR "xray\*" OR "x-ray\*" OR "x-radiograph\*" OR "imag\*" OR "diagnostic X-Ray\*" ) ) ) ) OR ( TITLE-ABS-KEY ( ( cholangiograph\* OR "endoscopic retrograde cholangiopancreatograph\*" OR cholecystograph\* OR videodefecography OR defecograph\* OR portograph\* OR "colonic transit study" OR "colonic transit studies" ) ) ) OR ( TITLE-ABS-KEY ( ( "Virtual Colonoscop\*" OR "Computed Tomographic Colonograph\*" OR "CT Colonograph\*" OR "X-Ray Computed Tomograph\*" OR "XRay Computed Tomograph\*" OR "CT X-Ray\$" OR "CT xray\$" OR tomodensitometr\$ OR "X-Ray CAT Scan\$" OR "xray CAT Scan\$" ) ) ) ) AND ( ( ALL ( "Constipation" OR "Functional Colonic Disease\*" ) ) OR ( TITLE-ABS-KEY ( ( constipat\* OR dyschezi\* OR "Colonic Inertia" OR "f\$ecal\* impact\*" OR "f\$ecal retention" OR "bowel dysfunction\$" OR "slow colonic transit\*" OR "non-retentive f\$ecal incontinence" OR "NFRI" OR "functional colonic disease\$" ) ) ) ) ) 7,177 document results

8 ( ALL ( "Constipation" OR "Functional Colonic Disease\*" ) ) OR ( TITLE-ABS-KEY ( ( constipat\* OR dyschezi\* OR "Colonic Inertia" OR "f\$ecal\* impact\*" OR "f\$ecal retention" OR "bowel dysfunction\$" OR "slow colonic transit\*" OR "non-retentive f\$ecal incontinence" OR "NFRI" OR "functional colonic disease\$" ) ) ) 127,240 document results

7 TITLE-ABS-KEY ( ( constipat\* OR dyschezi\* OR "Colonic Inertia" OR "f\$ecal\* impact\*" OR "f\$ecal retention" OR "bowel dysfunction\$" OR "slow colonic transit\*" OR "non-retentive f\$ecal incontinence" OR "NFRI" OR "functional colonic disease\$" ) ) 98,301 document results

6 ALL ( "Constipation" OR "Functional Colonic Disease\*" ) 125,650 document results

5 ( ALL ( all "abdominal radiograph\*" OR "Diagnostic Imaging" OR "computed tomographic colonography\*" ) ) OR ( TITLE-ABS-KEY ( ( ( abdom\* W/4 radiograph\* OR "diagnostic imag\*" OR "xray\*" OR "x-ray\*" OR "x-radiograph\*" OR "imag\*" OR "diagnostic X-Ray\*" ) ) ) ) OR ( TITLE-ABS-KEY ( ( cholangiograph\* OR "endoscopic retrograde cholangiopancreatograph\*" OR cholecystograph\* OR videodefecography OR defecograph\* OR portograph\* OR "colonic transit study" OR "colonic transit studies" ) ) ) OR ( TITLE-ABS-KEY ( ( "Virtual Colonoscop\*" OR "Computed Tomographic Colonograph\*" OR "CT Colonograph\*" OR "X-Ray Computed Tomograph\*" OR "XRay Computed Tomograph\*" OR "CT X-Ray\$" OR "CT xray\$" OR tomodensitometr\$ OR "X-Ray CAT Scan\$" OR "xray CAT Scan\$" ) ) ) 818,380 document results

4 TITLE-ABS-KEY ( ( "Virtual Colonoscop\*" OR "Computed Tomographic Colonograph\*" OR "CT Colonograph\*" OR "X-Ray Computed Tomograph\*" OR "XRay Computed Tomograph\*" OR "CT X-Ray\$" OR "CT xray\$" OR tomodensitometr\$ OR "X-Ray CAT Scan\$" OR "xray CAT Scan\$" ) ) 131,896 document results

3 TITLE-ABS-KEY ( ( cholangiograph\* OR "endoscopic retrograde cholangiopancreatograph\*" OR cholecystograph\* OR videodefecography OR defecograph\* OR portograph\* OR "colonic transit study" OR "colonic transit studies" ) ) 62,404 document results

2 TITLE-ABS-KEY ( ( ( abdom\* W/4 radiograph\* OR "diagnostic imag\*" OR "xray\*" OR "x-ray\*" OR "x-radiograph\*" OR "imag\*" OR "diagnostic X-Ray\*" ) ) ) 54,651 document results

1 ALL ( all "abdominal radiograph\*" OR "Diagnostic Imaging" OR "computed tomographic colonography\*" ) 694,379 document results
